# Supplementary material
Source: Springer Nature journal article supplement (https://www.springermedizin.de/resource/supplementary/12885_2011_3228_MOESM2_ESM.pdf/9463104)

**A**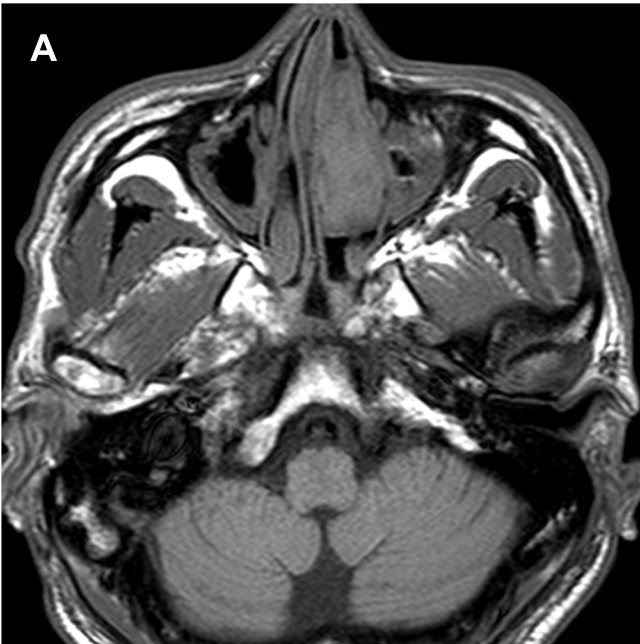**B**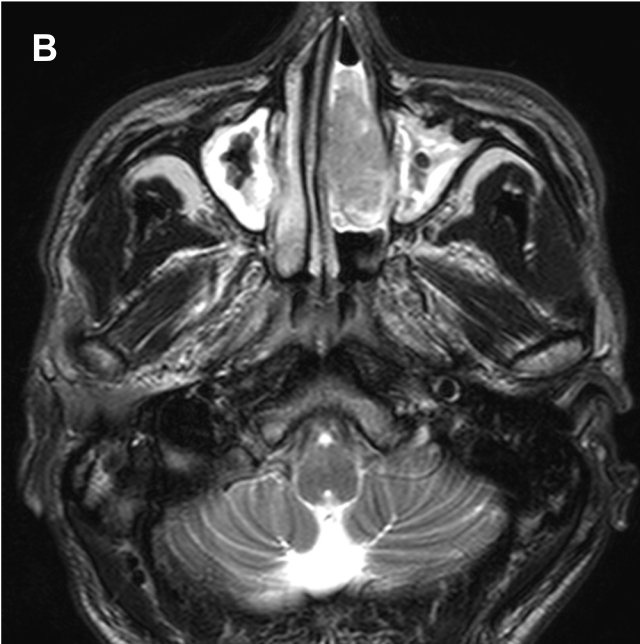**C**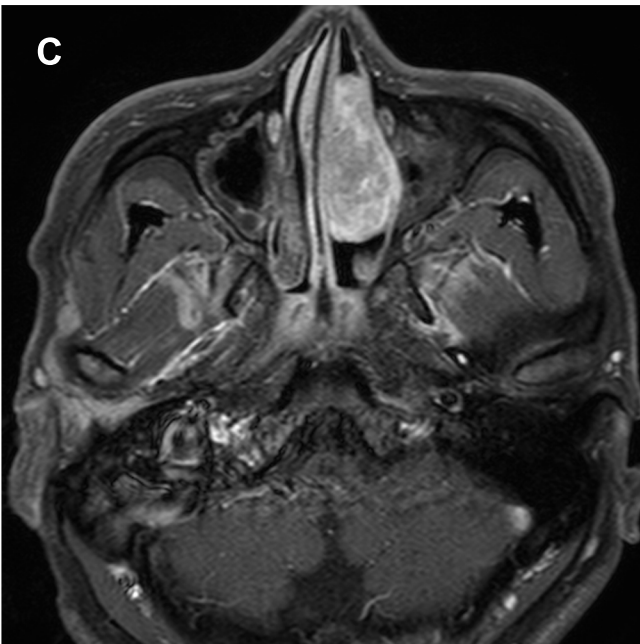**D**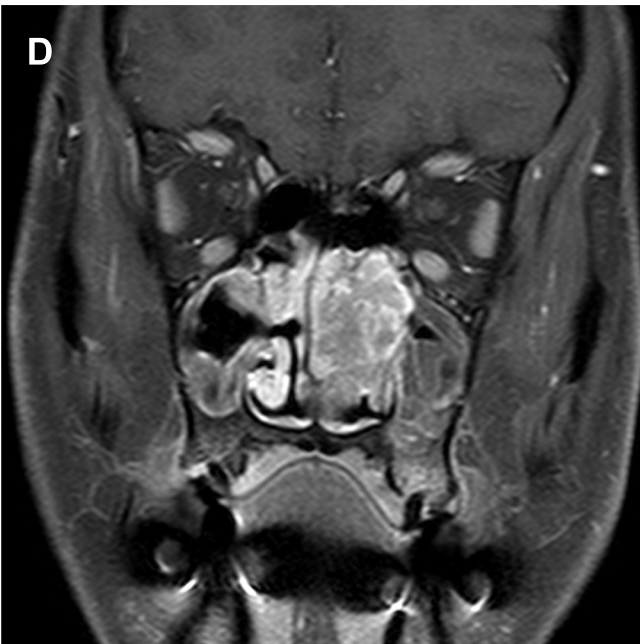

Supplement: MOESM2 [file 9463104]
